# Supplementary material for: Source apportionment of submicron organic aerosol at an urban background and a road site in Barcelona, Spain
Source: Copernicus journal article supplement (doi:10.5194/acpd-13-11167-2013), 2013-04-24
Supplement: Supplementary file 1 [file acpd-13-11167-2013-supplement.pdf]

1 **SUPPORTING INFORMATION**

2

3 **Source apportionment of submicron organic aerosol at an urban background**  
4 **and road site in Barcelona during SAPUSS**

5

6 Marta Alier, Barend L. van Drooge, Manuel Dall'Osto, Xavier Querol, Joan O. Grimalt,  
7 Romà Tauler

8

9 Department of Environmental Chemistry, Institute of Environmental Assessment and  
10 Water Research (IDAEA-CSIC), C/Jordi Girona, 18-26, 08034, Barcelona, Spain

11

12 Table SI 1. Seven solution component with all 35 compounds  
 13  
 14

| Seven solution component factor | Comment                                                                                                                                                                                                                                                                                                                                                                                                               |
|---------------------------------|-----------------------------------------------------------------------------------------------------------------------------------------------------------------------------------------------------------------------------------------------------------------------------------------------------------------------------------------------------------------------------------------------------------------------|
| 1 POA Urban 1                   | It maintains the features of the six factor solution POA Urban, with a main PAH (PAH_high) structure.                                                                                                                                                                                                                                                                                                                 |
| 2 POA Urban 2                   | POA Urban 2 (new component). This is a splitting of POA Urban 1. The merging of Urban POA 1 and Urban POA 2 from the seven solution component give the urban POA of the 6 component ( $R^2=1$ ). This solution is a splitting of the POA Urban.                                                                                                                                                                       |
| 3 OOA Urban                     | OOA Urban. This solution is very constant over the 6 factor solution. The regression line is 1:1, but only the $C_7-C_9$ signature is conserved in the loadings of the organic compounds, and the PAH-hopanes structure is lost.                                                                                                                                                                                      |
| 4 SOA BIO ISO                   | This component is really stable, has same temporal trend and same $R^2$ and same factor profile with the 6 and 7 factor solution. There is almost no difference between the 6 and 7 factor solution.                                                                                                                                                                                                                  |
| 5 SOA BIO PIN                   | Main component is still cis-pinonic acid, but the second one major one is a PAH. The temporal trend of this component is also less clear.                                                                                                                                                                                                                                                                             |
| 6 BBOA Reg.                     | This solution is similar to the 6 factor one. However, there is generally lower conc. ( $0.2 \mu\text{g m}^{-3}$ ) than previous studies ( $0.3-0.4 \mu\text{g m}^{-3}$ ). Overall the RS-UB correlation are the same ( $R^2=0.88$ ). However, the correlation between RS and UB for the last period is much better ( $R^2=0.95$ ) for the 6 component than the 7 one ( $R^2<0.7$ ). The 6 factor solution is better. |
| 7 SOA aged                      | This component maintains the feature of the aged SOA. However, the difference in conc. between RS and UB is very high. The 6 factor solution is better.                                                                                                                                                                                                                                                               |

15  
 16 Figure SI 1. Organic markers loadings, temporal trends and concentrations for the  
 17 seven solution  
 18

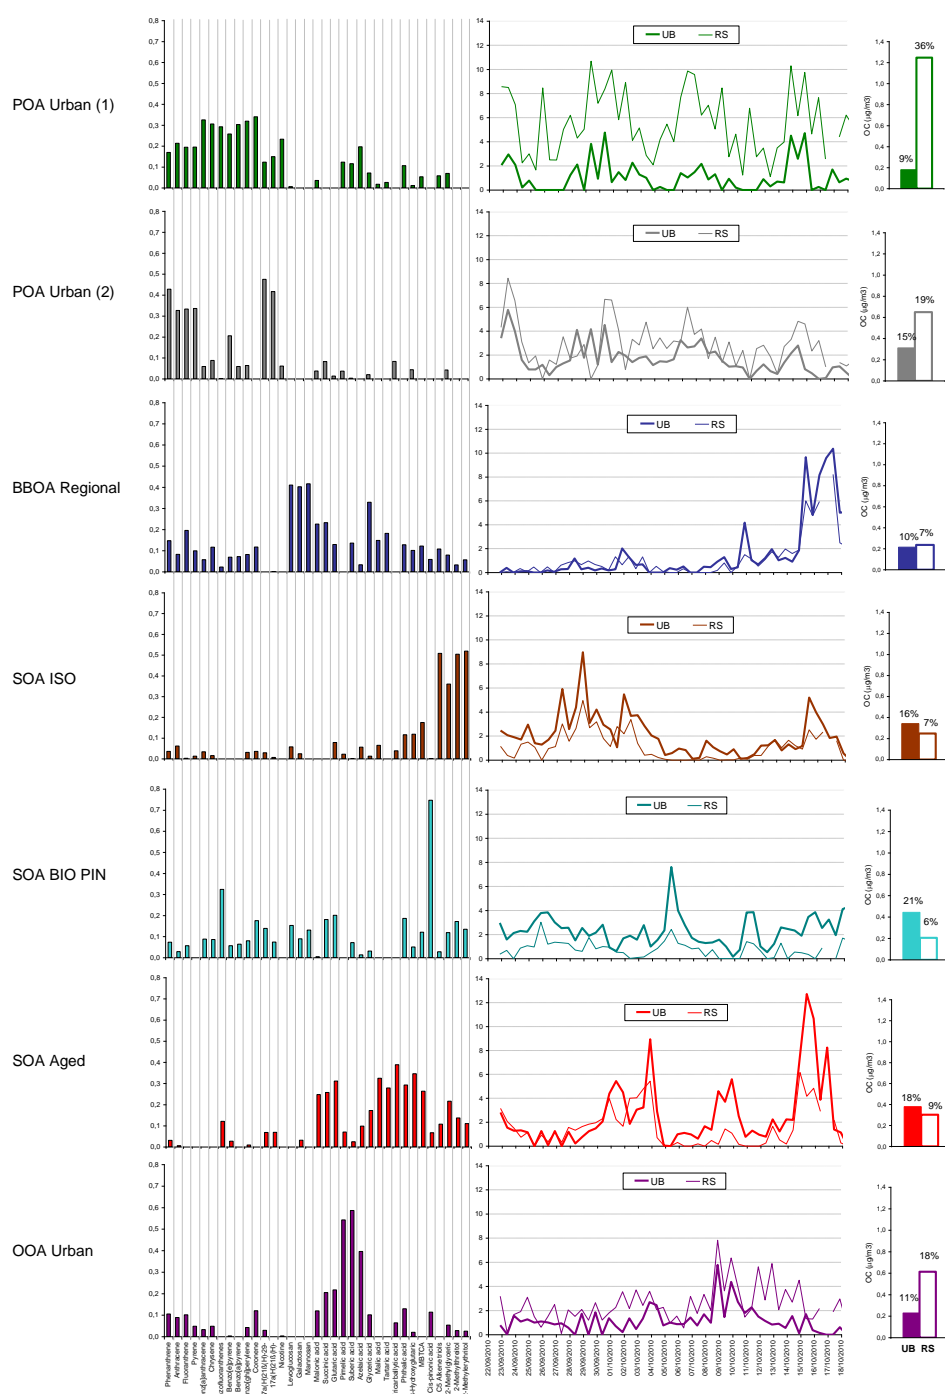

20

21 Figure SI1. MCR-ALS resolved profiles applying non-negativity constraints. Column on  
 22 the left shows the loading organic compound composition of the six selected  
 23 components. Column in the middle shows the temporal trend of the score values of the  
 24 six components. Column on the right shows the relative contribution of the scores (%)  
 25 as well as the estimated mass contribution of organic carbon to volume ( $\mu\text{g OCm}^{-3}$ ).
